# Supplementary material
Source: publisher site journal article supplement (https://www.dovepress.com/article/335679)
Supplement: Supplementary file 1 [file get_supplementary_file.php]

**Supplemental materials for “A sensitive PCR-based mismatch detection assay for circulating tumor DNA enrichment and screening”**

**Table S1. Oligos used in this study.**

| SM1: | 5’- GTG AGT GAG GTG GTT GAG GT – 3’ |
| --- | --- |
| SM2: | （PHO）3’- CAC TCA CTC CAC CAA CTC C – 5’ |
| SM3: | 5’- AC AAC TCC ACT CAC CAC CTC – 3’ |
| SM4: | 3’- GGG TG TTG AGG TGA GTG GTG GAG – 5’ |

**Table S2. Primers and probes used in this study.**

| **Standard PCR**[1] |  |
| --- | --- |
| EGFR L858R F: | 5’-GCAGCATGTCAAGATCACAGATT-3’ |
| EGFR L858R R: | 5’-CCTCCTTCTGCATGGTATTCTTTCT-3’ |
| EGFR L858R W: | 5’-VIC-AGTTTGGCCAGCCCAA-MGB-NFQ-3' |
| EGFR L858R M: | 5'-FAM-AGTTTGGCCCGCCCAA-MGB-NFQ-3' |
| EGFR 19 del F: | 5’-GTGAGAAAGTTAAAATTCCCGTC-3’ |
| EGFR 19 del R: | 5’-CACACAGCAAAGCAGAAAC-3’ |
| EGFR 19 del W: | 5'-VIC-ATCGAGGATTTCCTTGTTG-MGB-NFQ-3' |
| EGFR 19 del M: | 5'-FAM-AGGAATTAAGAGAAGCAACATC-MGB-NFQ-3' |
| KRAS G12D F: | 5’-GCCTGCTGAAAATGACTGAATATAAACT -3’ |
| KRAS G12D R: | 5’-GCTGTATCGTCAAGGCACTCTT -3’ |
| KRAS G12D W: | 5’-VIC-TTGGAGCTGGTGGCGTA -MGB-NFQ-3’ |
| KRAS G12D M: | 5’-FAM-TTGGAGCTGATGGCGTA –MGB-NFQ-3’ |
| KRAS G13D F: | 5’-GCCTGCTGAAAATGACTGAATATAAACT-3’ |
| KRAS G13D R: | 5’-GAATTAGCTGTATCGTCAAGGCACT -3’ |
| KRAS G13D W: | 5’-VIC- CTTGCCTACGCCACCAG-MGB-NFQ-3’ |
| KRAS G13D M: | 5’-FAM-CTTGCCTACGTCACCAG – MGB-NFQ-3’ |
| Note: “F” represent forward primer, “R” represent reverse primer, “W” represent wildtype probe and “M” represent mutant assay probe. | |

| **Surveyor method** |  |
| --- | --- |
| Primer F | 5’- GTG AGT GAG GTG GTT GAG GT – 3’ |
| Primer R | 5’- GAG GTG GTG AGT GGA GTT GT – 3’ |
| SM-EGFR L858R-1 | 5’-FAM-CAGCATGTCAAGATCACAGATT–MGB-NFQ-3’ |
| SM-EGFR L858R-2 | 5’-VIC- CTCCTTCTGCATGGTATTCTTTCT–MGB-NFQ-3’ |
| SM-EGFR 19 del-1 | 5’-FAM-TGAGAAAGTTAAAATTCCCGTC–MGB-NFQ-3’ |
| SM-EGFR 19 del-2 | 5’-VIC- CACACAGCAAAGCAGAAAC–MGB-NFQ-3’ |
| SM-KRAS G12X/G13X-1 | 5’-FAM-CCTGCTGAAAATGACTGAATATAAACT–MGB-NFQ-3’ |
| SM-KRAS G12X/G13X-2 | 5’-VIC- AATTAGCTGTATCGTCAAGGCACT–MGB-NFQ-3’ |

**Table S3. ddPCR measurements of mutation DNA copy numbers across serial dilution cfDNA samples.**

|  | Copy numbers of mutant DNA detected | | |
| --- | --- | --- | --- |
| DNA amount (ng) | EGFR/L858R | EGFR/19 exon deletion | EGFR G12D/G13D |
| 80 | 224.9 | 238.7 | 521.6 |
| 40 | 101.9 | 119.5 | 267 |
| 20 | 55.3 | 59.5 | 123.2 |
| 10 | 25 | 30.7 | 67.1 |
| 5 | 15.4 | 18.9 | 30 |
| 2.5 | 6.7 | 7.1 | 15.4 |
| 1.25 | 3.2 | 5.4 | 8 |
| 0.625 | 1.7 | 2.3 | 3.2 |

**Table S4. Compare standard PCR and Surveyor method measurement of EGFR mutant gene copy numbers of cfDNA samples.**

| EGFR/L858R | Copy numbers | |
| --- | --- | --- |
| No. of samples | Standard PCR | Surveyor method |
| EL1 | 8 | 22 |
| EL2 | 13 | 26 |
| EL3 | 66 | 152 |
| EL4 | 78 | 156 |
| EL5 | 32 | 74 |
| EL6 | 13 | 24 |
| EL7 | 5 | 12 |
| EL8 | 4 | 7 |

| EGFR/19 exon deletion | Copy numbers | |
| --- | --- | --- |
| No. of samples | Standard PCR | Surveyor method |
| ED1 | 54 | 106 |
| ED2 | 96 | 132 |
| ED3 | 44 | 56 |
| ED4 | 38 | 62 |
| ED5 | 3 | 8 |
| ED6 | 14 | 34 |
| ED7 | 12 | 30 |
| ED8 | 20 | 41 |

**References**

[1] Sacher A G, Paweletz C, Dahlberg S E, et al. Prospective Validation of Rapid Plasma Genotyping for the Detection of EGFR and KRAS Mutations in Advanced Lung Cancer. JAMA Oncology. 2016, 2(8): 1014.
